# Supplementary material for: HMGB1-RAGE pathway drives peroxynitrite signaling-induced IBD-like inflammation in murine nonalcoholic fatty liver disease
Source: PubMed Central journal article supplement — Redox Biol. 2017 May 10;13:8–19. doi: 10.1016/j.redox.2017.05.005 (PMC5447385; doi:10.1016/j.redox.2017.05.005), 2017-05-10

# Suppl Fig1A

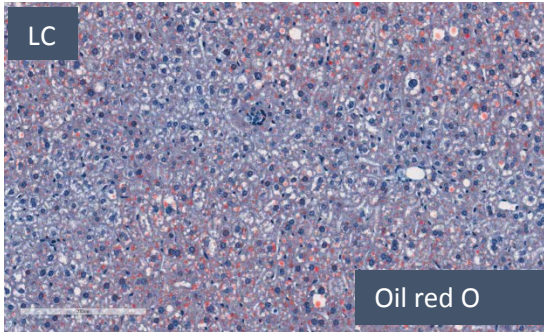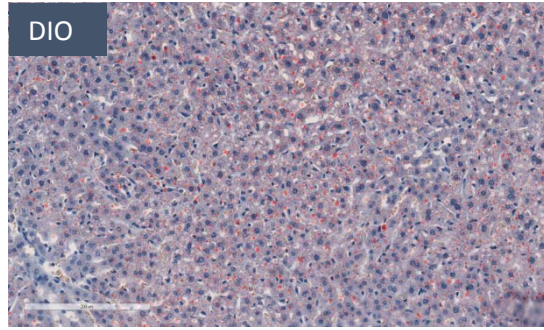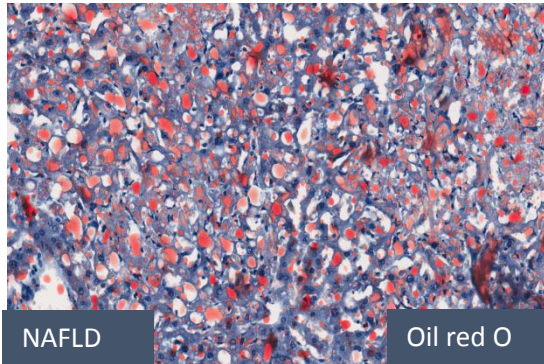

## 1B

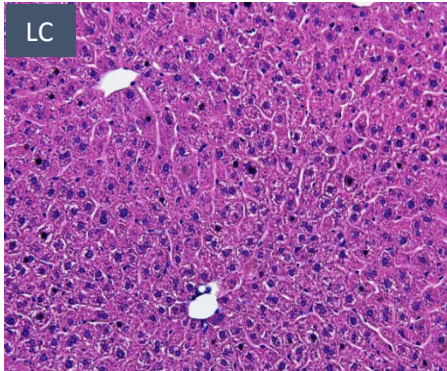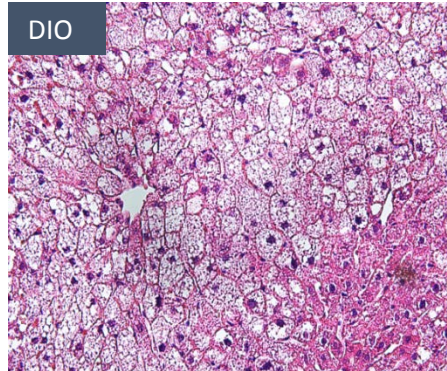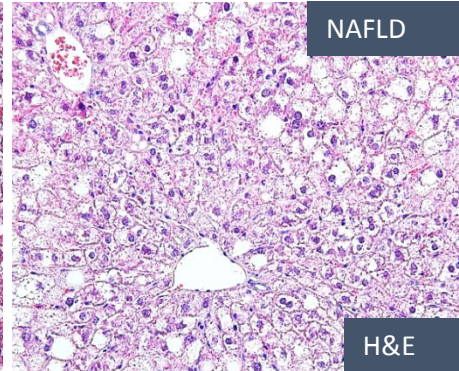

## Suppl Fig1C NASH CRN Scores

|                             | DIO     | NAFLD   | Lean Control |
|-----------------------------|---------|---------|--------------|
| <b>Steatosis</b>            | 2       | 3       | 0-1          |
| <b>Lobular Inflammation</b> | 1       | 3       | 0            |
| <b>Heptocyte Ballooning</b> | 1       | 2       | 0            |
| <b>Stage of Fibrosis</b>    | Not Obs | Not Obs | Not Observed |

### Suppl Fig. 2A

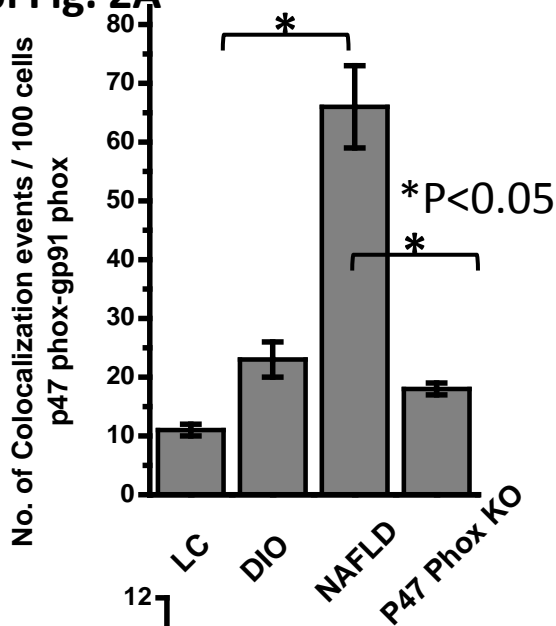

### 3A

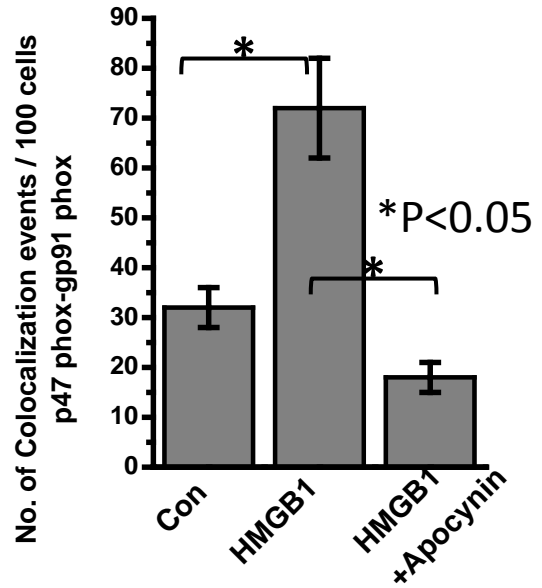

### 2B

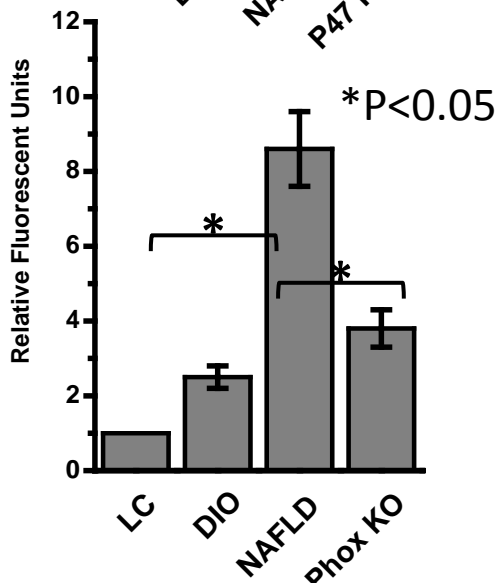

### 3B

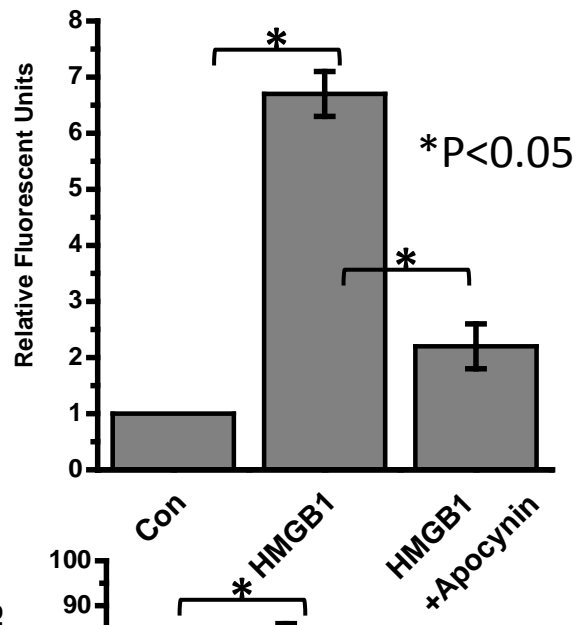

### 2C

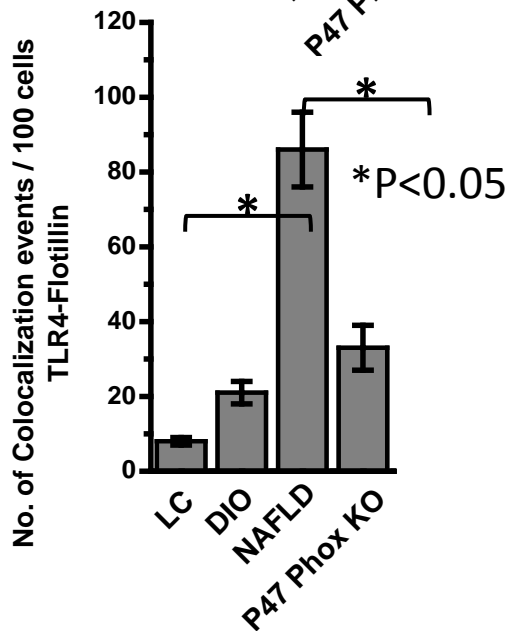

### 3C

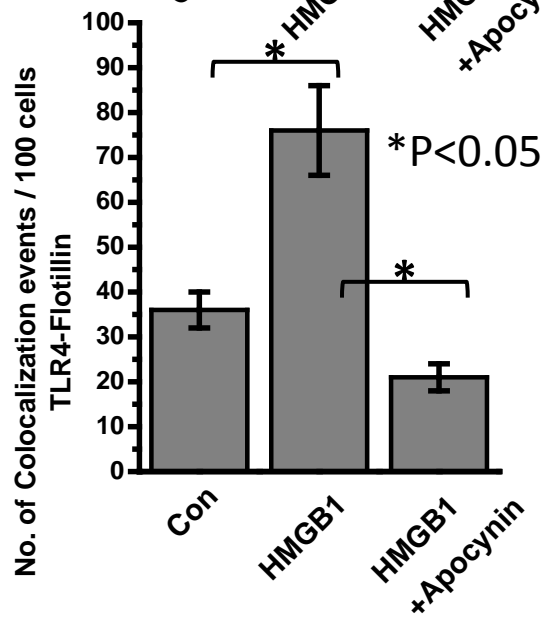

Suppl Fig. 4A

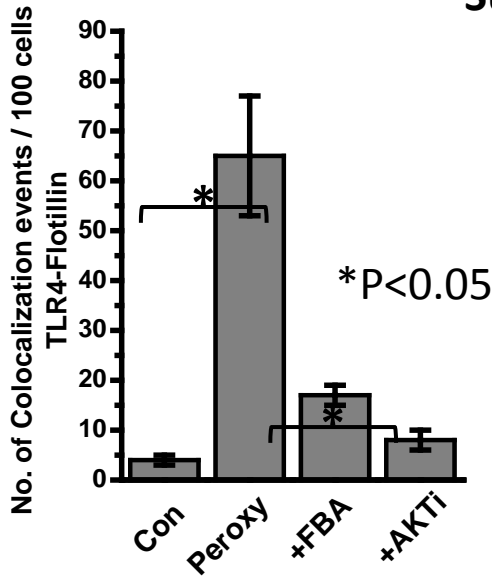

Suppl Fig. 5A

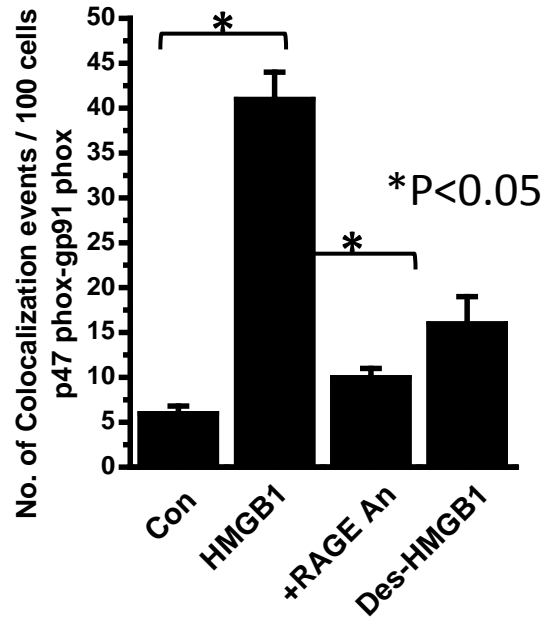

4B

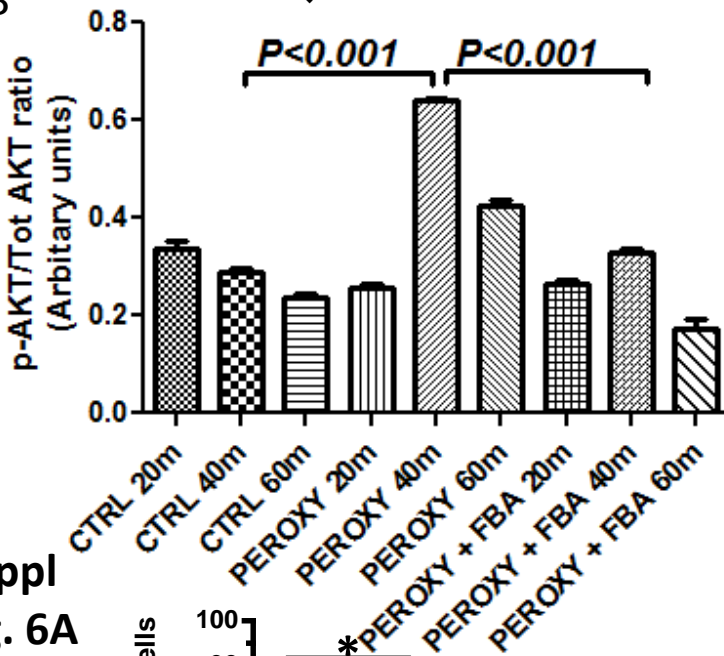

5B

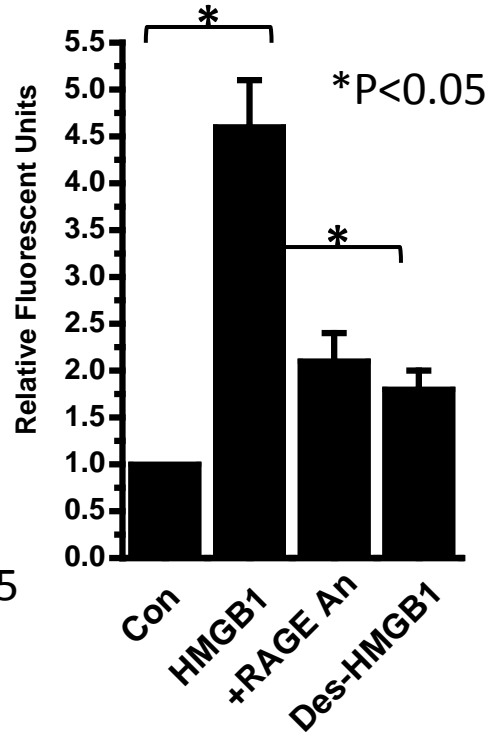

Suppl Fig. 6A

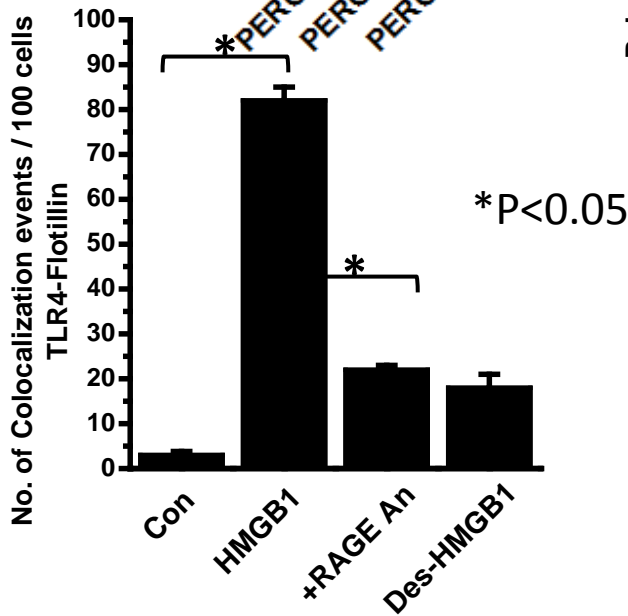

Supplement: mmc2.pdf [file mmc2.pdf]
